# Supplementary material for: Assessment of the interacting mechanism between Candida rugosa lipases and hydroxyapatite and identification of the hydroxyapatite-binding sequence through proteomics and molecular modelling
Source: Royal Society of Chemistry journal article supplement (doi:10.1039/c6ra07521e), 2016-01-01
Supplement: c6ra07521e1.pdf [file c6ra07521e1.pdf]

**Assessment of interacting mechanism between *Candida rugosa* lipases and hydroxyapatite and identification of hydroxyapatite-binding sequence through proteomics and molecular modelling**

*Jovana Trbojević Ivić,<sup>†</sup> Aleksandra Dimitrijević,<sup>‡</sup> Nenad Milosavić,<sup>§,\*</sup> Dejan Bezbradica,<sup>1</sup> Branko J. Drakulić,<sup>#</sup> Marija Gavrović Jankulović,<sup>1</sup> Marija Pavlović,<sup>Δ</sup> Helene Rogniaux,<sup>Δ</sup> Dušan Veličković<sup>1</sup>*

**Supporting information**

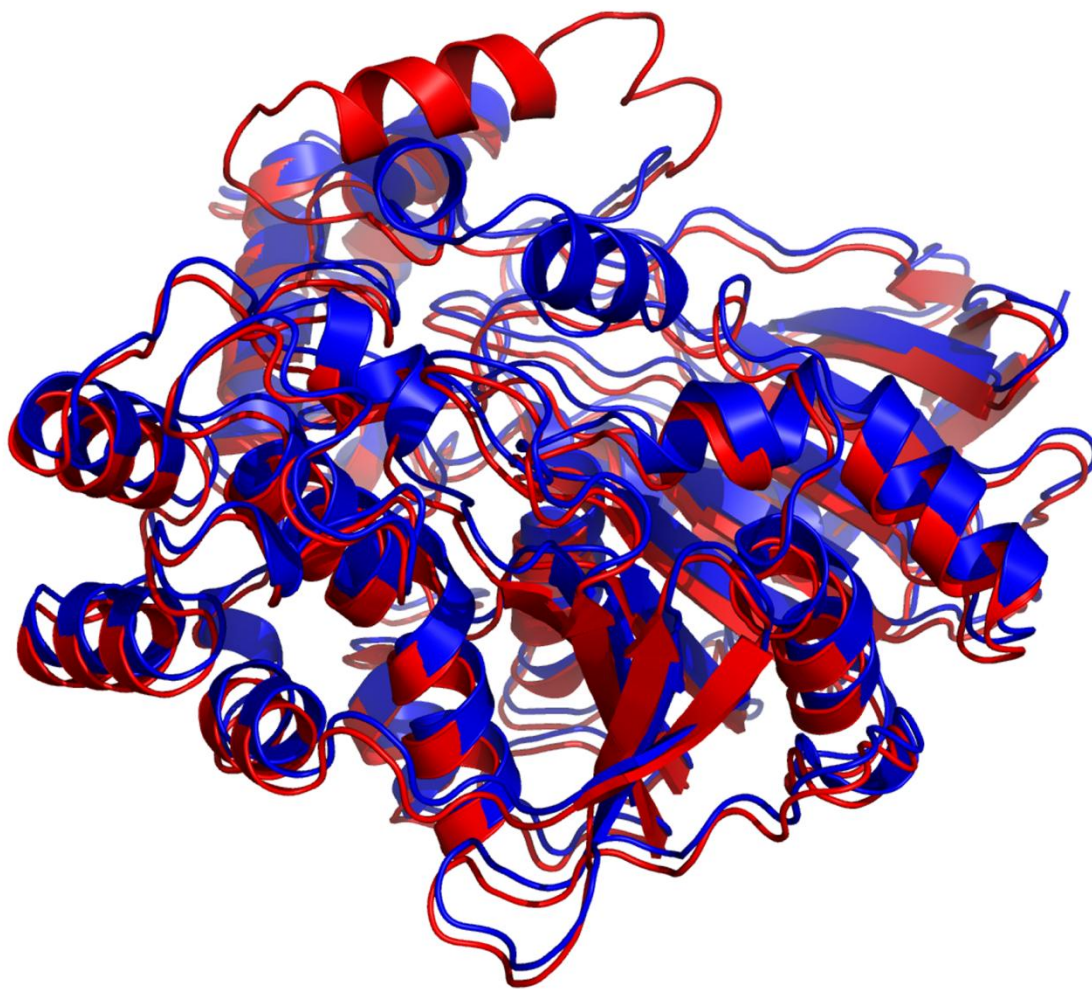

**Fig S1.** Superimposed structures of *Candida rugosa* lipase, isoform I, in 'open' (PDB entry 1CRL, red) and in 'closed' conformation (PDB entry 1THR, blue).

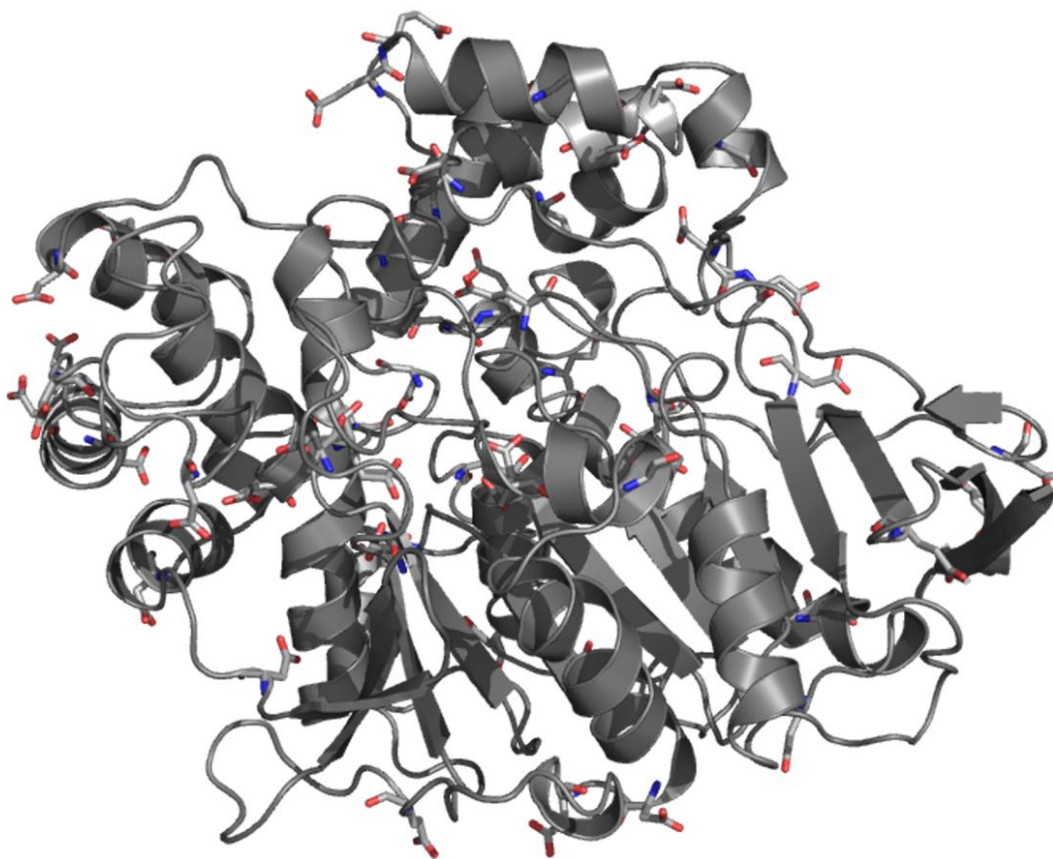

**Figure S2.** Asp and Glu residues, depicted as stick representation, in structure of *Candida rugosa* lipase, isoform I, in 'open' conformation (PDB entry 1CRL)

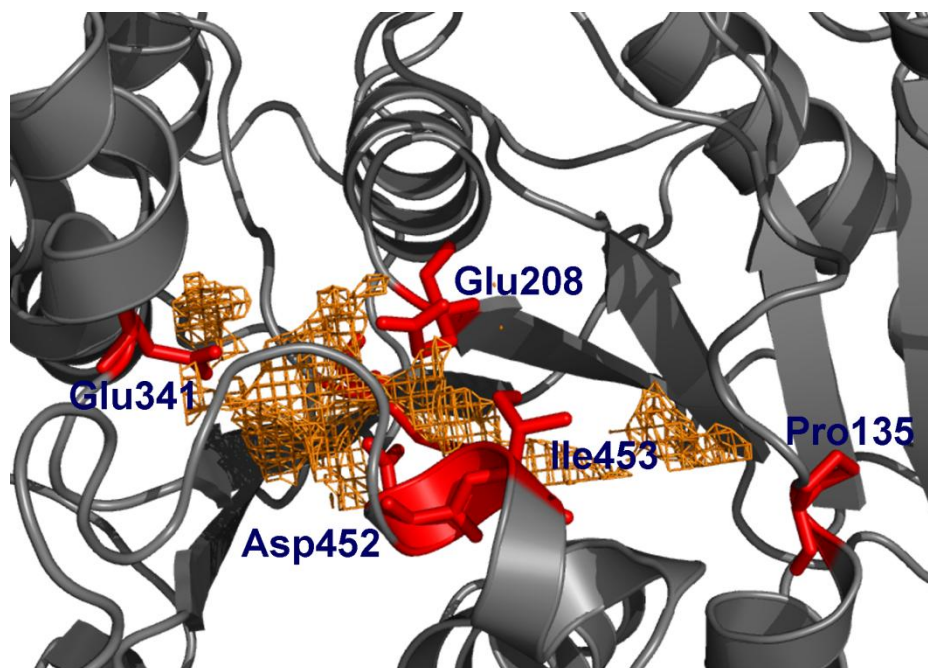

**Figure S3.** Molecular interaction field of Ca<sup>2+</sup> probe (orange, mesh representation) on isocontour level of -75 kcal/mol in the cleft of 1CRL, near the active site. Representative residues proximal to MIF are shown in stick presentation.
